# Supplementary material for: Aromatic bi-, tri- and tetracarboxylic acid doped polyaniline nanotubes: effect on morphologies and electrical transport properties
Source: Royal Society of Chemistry journal article supplement (doi:10.1039/c3tc32152e), 2014-01-01
Supplement: c3tc32152e1.pdf [file c3tc32152e1.pdf]

**Electronic Supplementary Information (ESI)**

**Aromatic Bi-, Tri- and Tetracarboxylic Acid doped Polyaniline  
Nanotubes: Effect of Morphology and Electrical Transport  
Properties.**

**Utpal Rana, Sanjoy Mondal, Jhuma Sannigrahi, Pradip Kumar Sukul, Md. Asif Amin,  
Subham Majumdar and Sudip Malik**

<sup>a</sup> *Polymer Science Unit, Indian Association for the Cultivation of Science, 2A & 2B Raja  
S.C. Mullick Road., Jadavpur, Kolkata –700032, India.*

<sup>b</sup> *Department of Solid State Physics, Indian Association for the Cultivation of Science, 2A  
and 2B Raja S. C. Mullick Road, Jadavpur, Kolkata –700032, India.*

**Table of content**

|                                                                            |     |
|----------------------------------------------------------------------------|-----|
| 1) Preparation of aromatic acid/PANI composites, Table S1.....             | S2  |
| 2) <sup>1</sup> H-NMR Spectra of BPCA.....                                 | S3  |
| 3) <sup>13</sup> C-NMR Spectra of BPCA.....                                | S4  |
| 4) <sup>1</sup> H-NMR Spectra of TPCA.....                                 | S5  |
| 5) <sup>13</sup> C-NMR Spectra of TPCA.....                                | S6  |
| 6) <sup>1</sup> H-NMR Spectra of the PANI nanocomposites .....             | S7  |
| 7) FT-IR spectra of the PANI nanocomposites.....                           | S8  |
| 8) UV-Vis spectra of the PANI nanocomposites.....                          | S9  |
| 9) FESEM image di- and monocarboxylic acid PANI composite.....             | S10 |
| 10) Morphological study of bi-, tri-, tetracarboxylic acid doped PANI..... | S11 |
| 11) pH study.....                                                          | S12 |
| 12) Conductivity results, Table S2.....                                    | S13 |
| 13) Reference.....                                                         | S14 |

1) **Table S1:** Preparation of polyaniline using different aromatic acids.

| Name of the Composite    | Aniline (mmol) | Acid (mmol)      | APS (mmol)       | [Ani]/[APS] | [Acid]/[Ani]  | Yield (%) |
|--------------------------|----------------|------------------|------------------|-------------|---------------|-----------|
| <b>BA/PANI (0.25)</b>    | 102 mg (1.096) | 31.72 mg (0.26)  | 232.56 mg (1.02) | 1:1         | <b>0.25:1</b> | 72.5      |
| <b>BDA-1/PANI (0.50)</b> | 102 mg (1.096) | 83.0 mg (0.50)   | 232.56 mg (1.02) | 1:1         | <b>0.50:1</b> | 73.2      |
| <b>BDA-1/PANI (0.25)</b> | 102 mg (1.096) | 43.19 mg (0.26)  | 232.56 mg (1.02) | 1:1         | <b>0.25:1</b> | 75.6      |
| <b>BDA-2/PANI (0.25)</b> | 102 mg (1.096) | 43.19 mg (0.26)  | 232.56 mg (1.02) | 1:1         | <b>0.25:1</b> | 76.4      |
| <b>BDA-3/PANI (0.25)</b> | 102 mg (1.096) | 43.19 mg (0.26)  | 232.56 mg (1.02) | 1:1         | <b>0.25:1</b> | 72.8      |
| <b>BTA-1/PANI (0.33)</b> | 102 mg (1.096) | 69.3 mg (0.33)   | 232.56 mg (1.02) | 1:1         | <b>0.33:1</b> | 71.1      |
| <b>BTA-1/PANI (0.25)</b> | 102 mg (1.096) | 54.68 mg (0.26)  | 232.56 mg (1.02) | 1:1         | <b>0.25:1</b> | 80.2      |
| <b>BTA-1/PANI (0.10)</b> | 102 mg (1.096) | 21.42 mg (0.10)  | 250 mg (1.096)   | 1:1         | <b>0.10:1</b> | 73.2      |
| <b>BTA-1/PANI (0.01)</b> | 102 mg (1.096) | 2.14 mg (0.010)  | 250 mg (1.096)   | 1:1         | <b>0.01:1</b> | 74.1      |
| <b>BTA-2/PANI (0.25)</b> | 102 mg (1.096) | 54.68 mg (0.26)  | 250 mg (1.096)   | 1:1         | <b>0.25:1</b> | 82.8      |
| <b>BTA-3/PANI (0.25)</b> | 102 mg (1.096) | 54.68 mg (0.26)  | 250 mg (1.096)   | 1:1         | <b>0.25:1</b> | 86.0      |
| <b>BTCA/PANI (0.25)</b>  | 102 mg (1.096) | 66.06 mg (0.26)  | 250 mg (1.096)   | 1:1         | <b>0.25:1</b> | 69.7      |
| <b>BPCA/PANI (0.25)</b>  | 55.8 mg (0.60) | 43.79 mg (0.15)  | 139.2 mg (0.60)  | 1:1         | <b>0.25:1</b> | 67.9      |
| <b>TPCA/PANI (0.25)</b>  | 102 mg (1.096) | 113.99 mg (0.26) | 250 mg (1.096)   | 1:1         | <b>0.25:1</b> | 51.60     |

**$^1\text{H}$  NMR spectra of BPCA<sup>S1</sup>:**

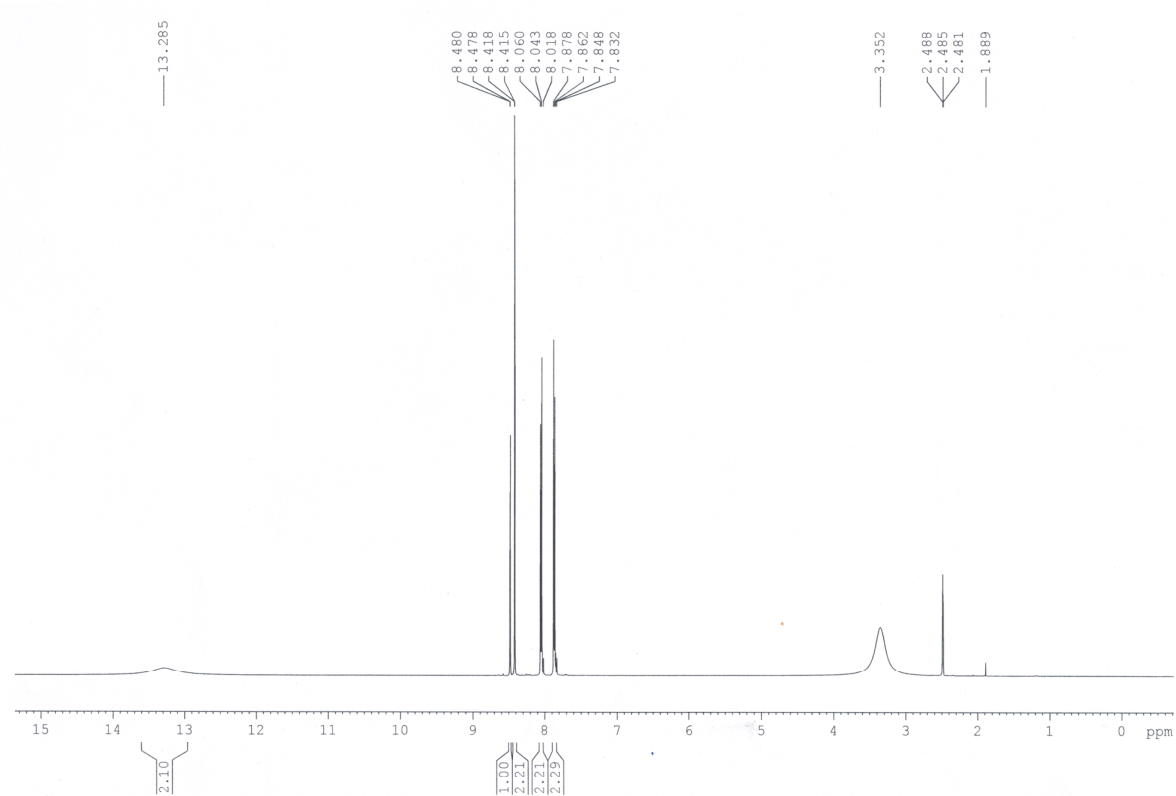

**Fig. S1:**  $^1\text{H}$ -NMR of BPCA in DMSO- $d_6$  solvent, 300 MHz

# <sup>13</sup>C-NMR of BPCA:

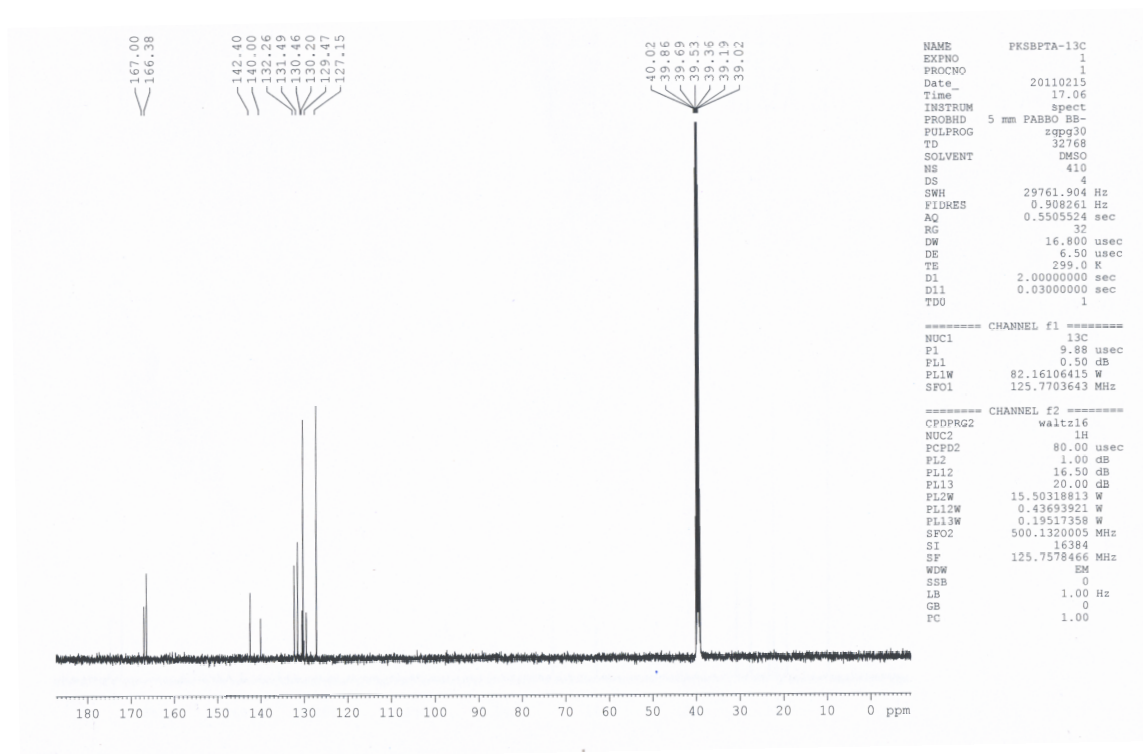

**Fig. S2.** <sup>13</sup>C-NMR of BPCA in DMSO-d<sub>6</sub> solvent, 300 MHz

**$^1\text{H-NMR}$  of TPCA<sup>S1</sup>:**

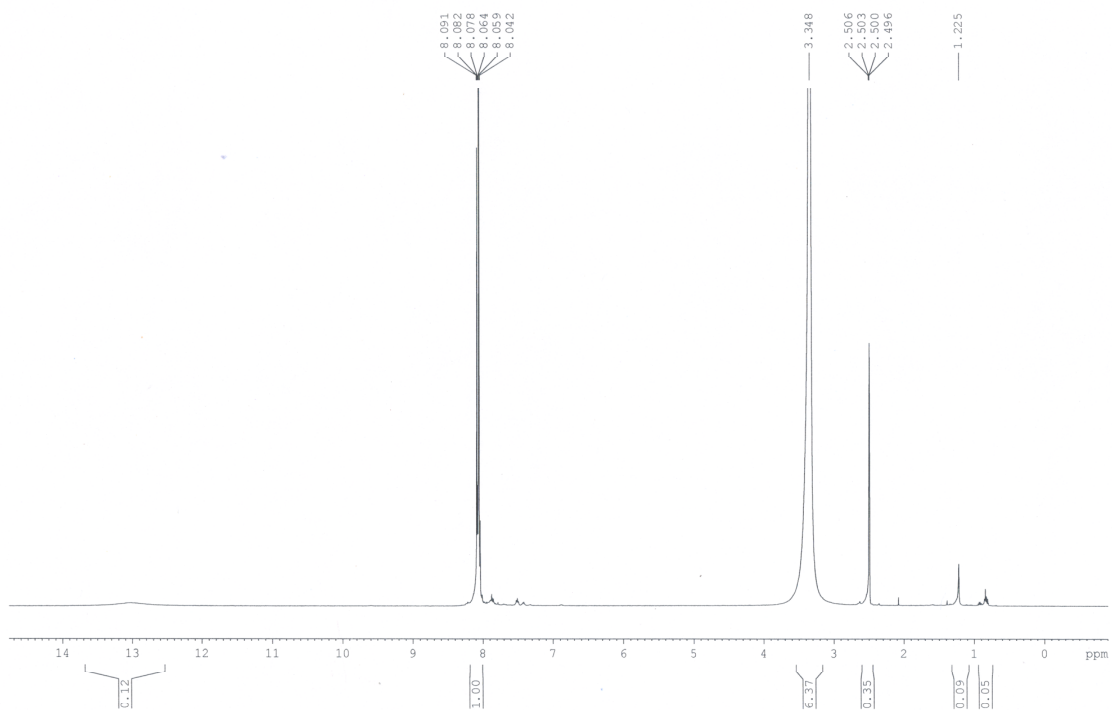

**Fig S3:**  $^1\text{H-NMR}$  of TPCA in DMSO- $d_6$  solvent, 300 MHz

# <sup>13</sup>C-NMR of TPCA

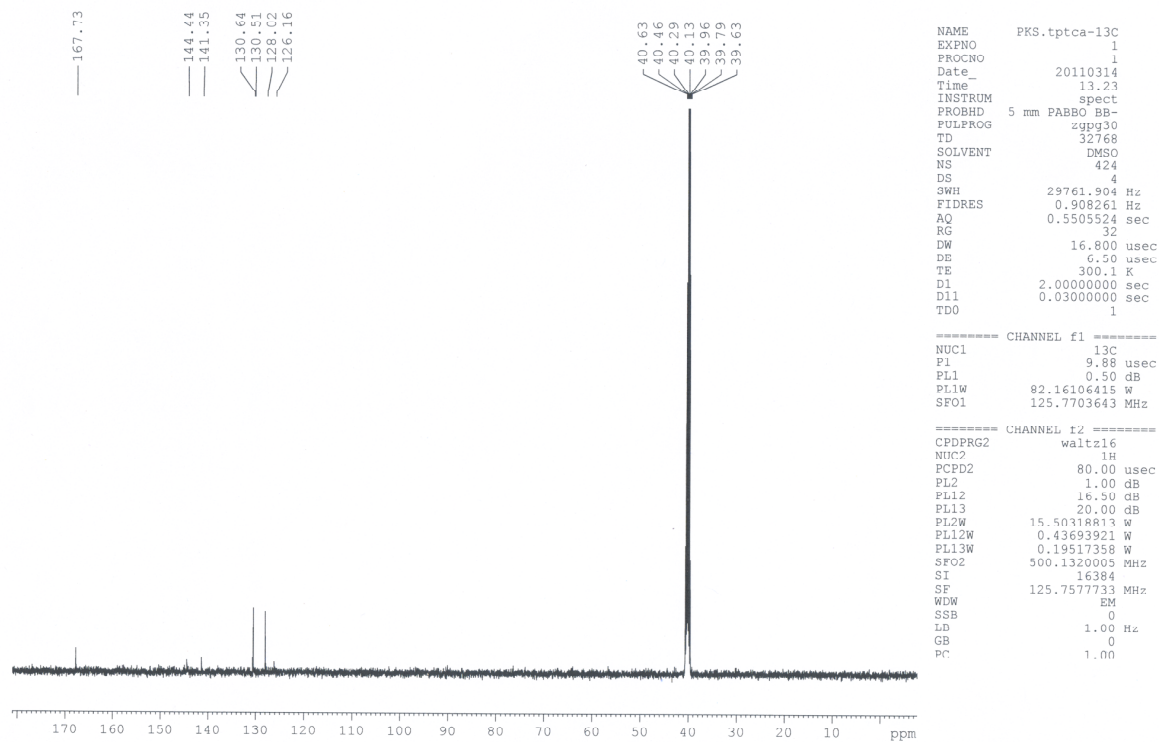

**Fig. S4:** <sup>13</sup>C-NMR of TPCA in DMSO-d<sub>6</sub> solvent, 300 MHz

3)  $^1\text{H-NMR}$  spectra of the PANI nanocomposite:

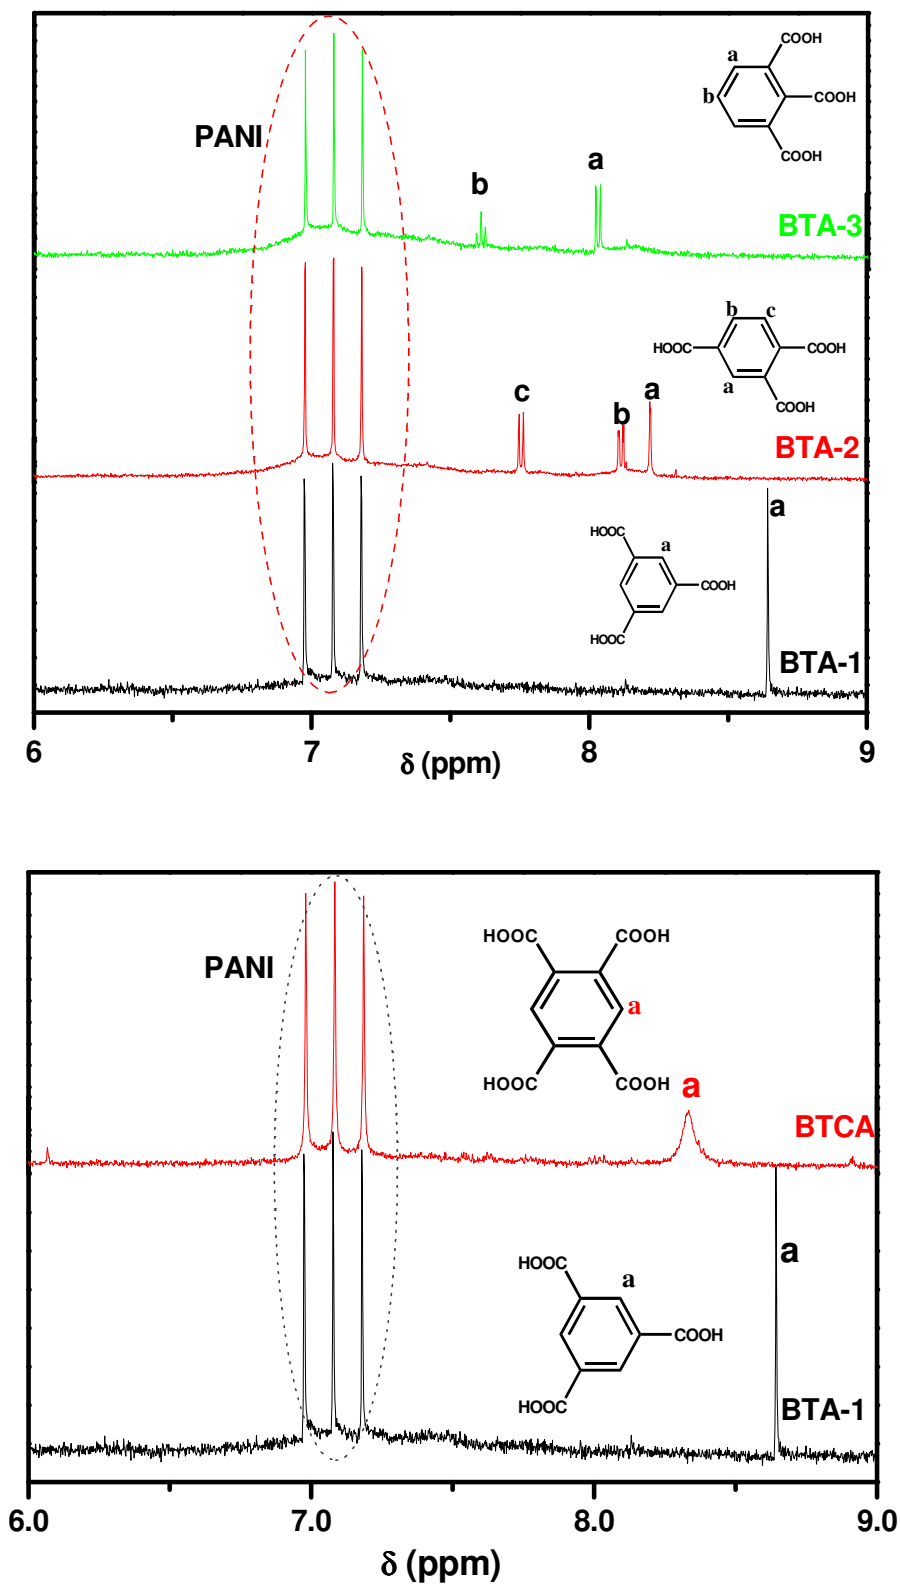

**Fig. S5:**  $^1\text{H-NMR}$  spectra of PANI nanostructure doped by different aromatic tricarboxylic acids in solvent  $\text{DMSO-d}_6$ , 500 MHz.

#### 4) FT-IR. Spectra of PANI nanocomposites

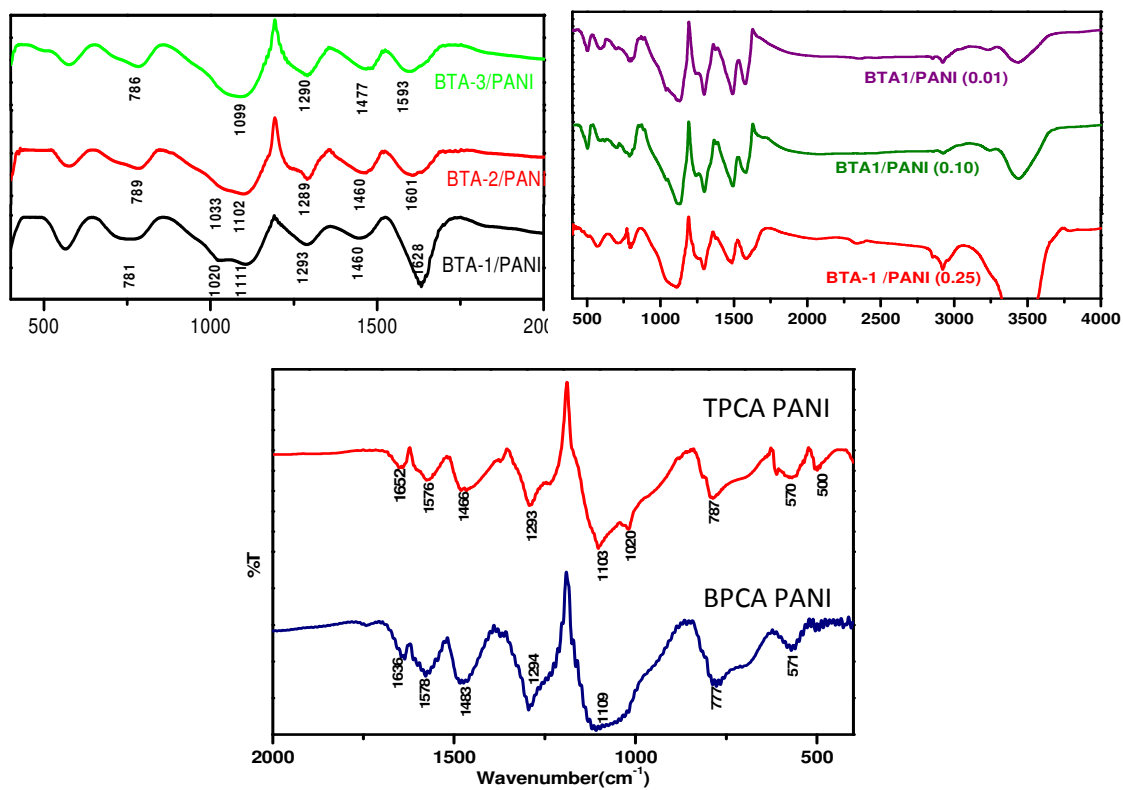

**Fig. S6:** FT-IR spectra of PANI nanostructure doped by different aromatic tricarboxylic acids.



### 5) UV-Vis spectra of PANI nanocomposites:

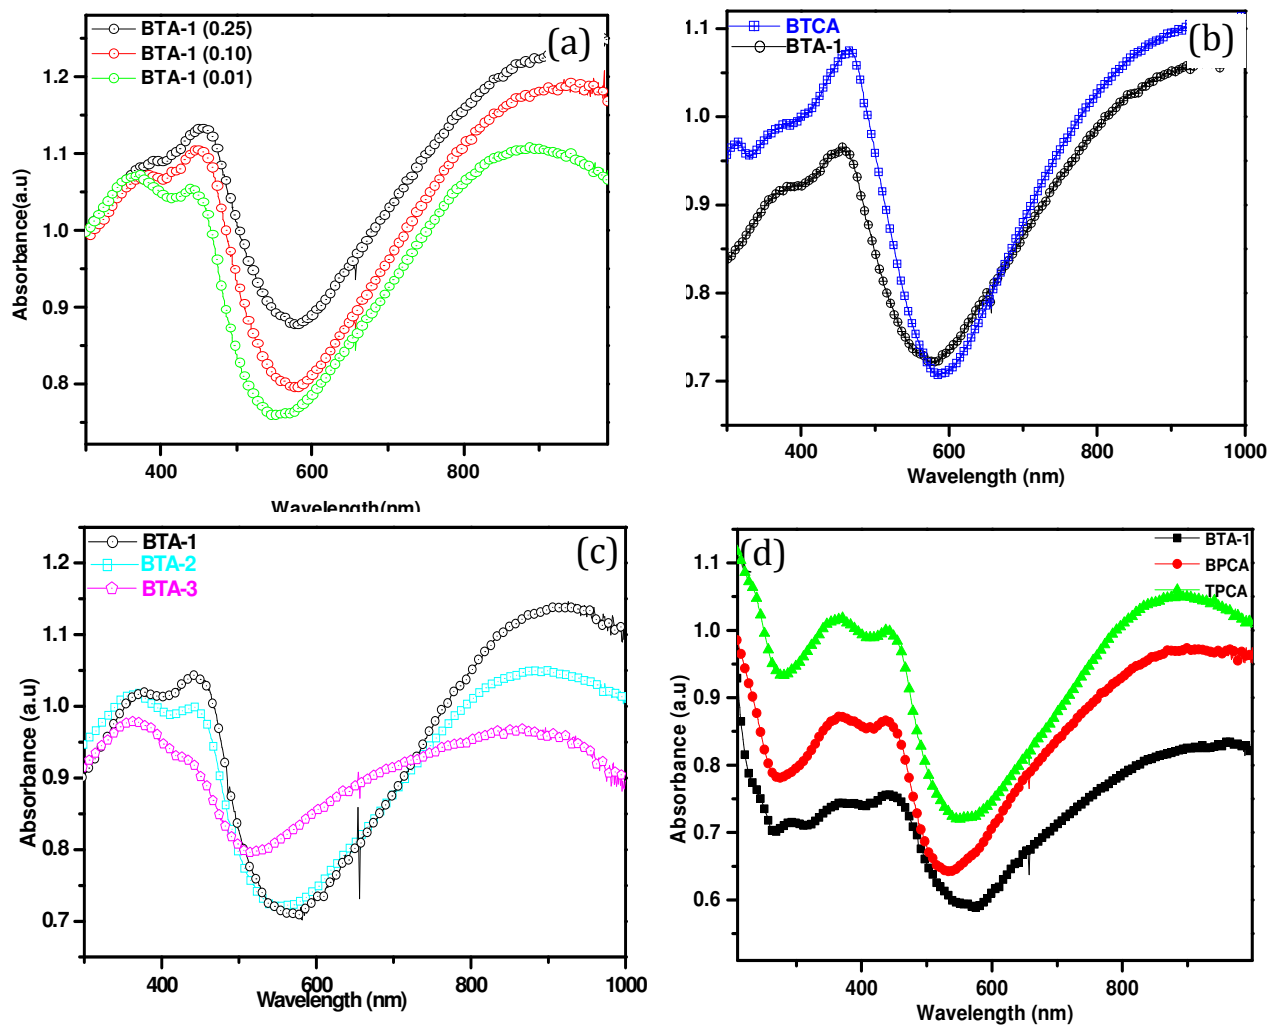

**Fig. S7:** UV-Vis spectra of PANI nanostructure doped by different aromatic tricarboxylic acids.

**FESEM image di and monocarboxylic acid PANI composite:**

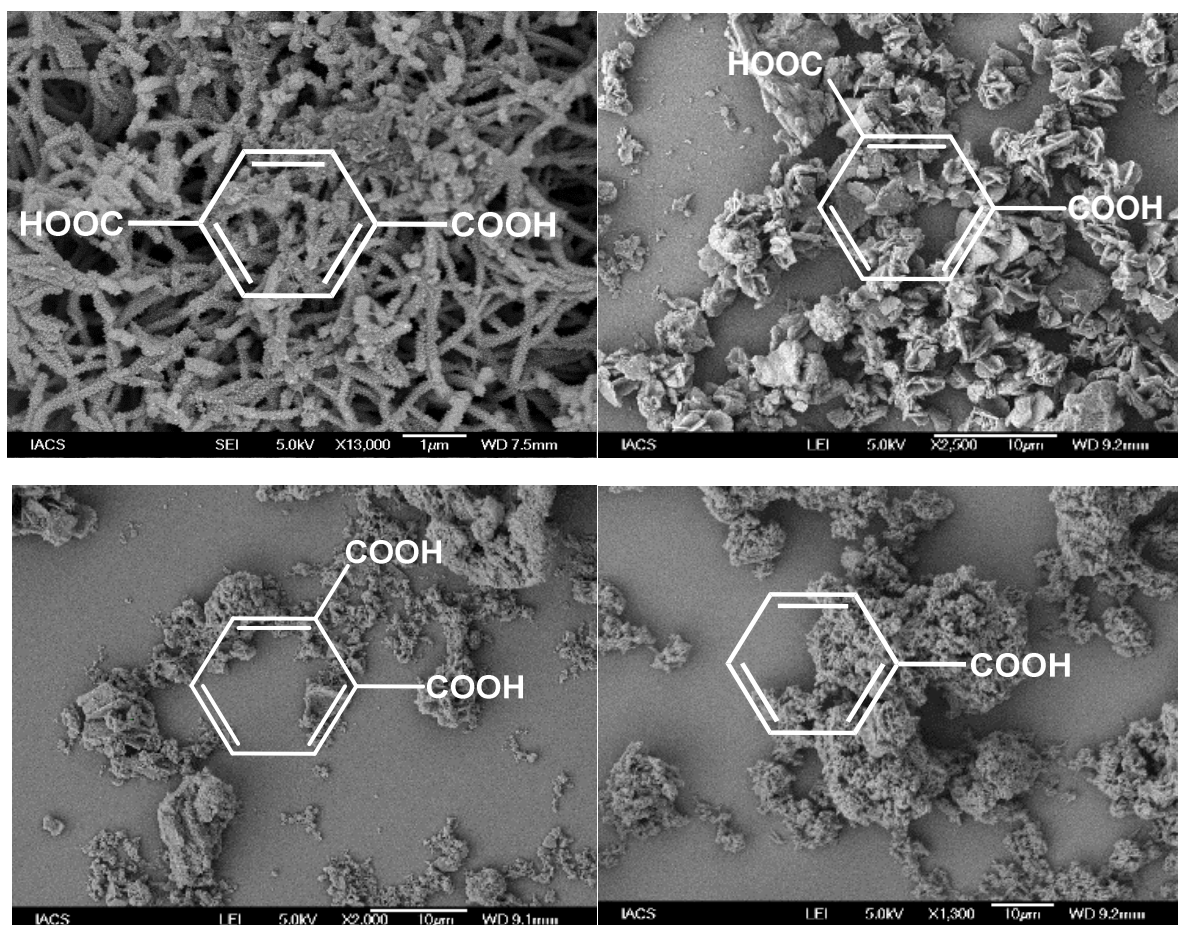

**Fig. S8:** FESEM-images of BDA-1/PANI, BDA-2/PANI, BDA-3/PANI and BA/PANI. Synthetic condition, [acid]/ [aniline] = 0.25, [aniline]/[APS]=1.00.

**Morphological study of bi-, tri-, tetracarboxylic acid doped PANI:**

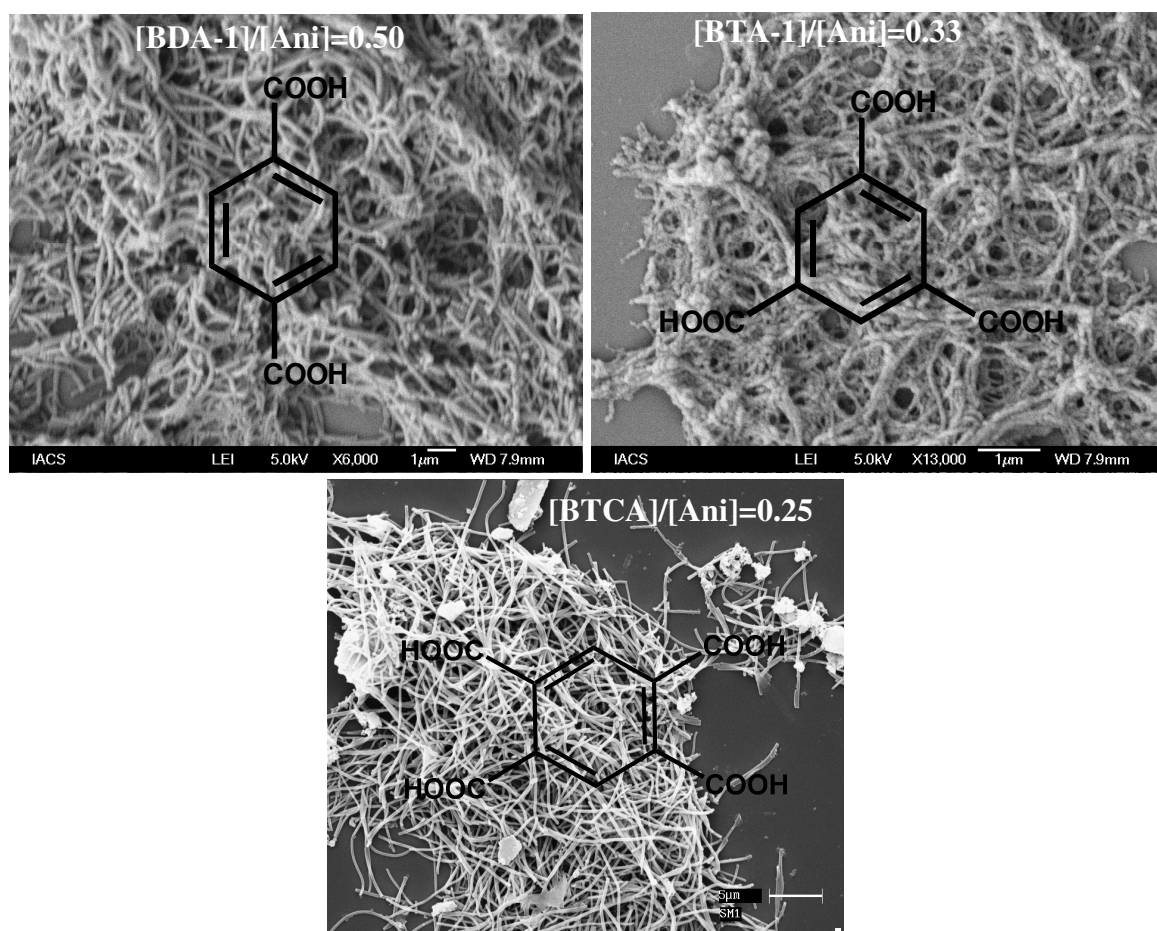

**Fig. S9:** FESEM-images of BDA-1/PANI, BTA-1/PANI, and BTCA/PANI under same stoichiometric condition (mole ratio of carboxylic acid unit to aniline) and [aniline]/[APS]=1.00.

### pH Study:

pH profile of the polymerization of aniline in presence of three symmetrical acids BDA-1/PANI, BTA-1/PANI and BTCA/PANI under same stoichiometric condition (mole ratio of carboxylic acid unit to aniline) shown in Fig. S10. The curve indicates that the pH changes with respect to time for all acids. The same trend is followed because all acids are weak in nature and starting stoichiometric ratios of all systems are same.<sup>S2</sup> In three cases, final pH of the medium is ~2.8 as we have carried out all the reaction in [aniline]/[APS]=1:1 ratio. Excess APS that should not be present in the reaction medium will generate the excess H<sub>2</sub>SO<sub>4</sub> which decreases the pH of the medium more.<sup>S3</sup>

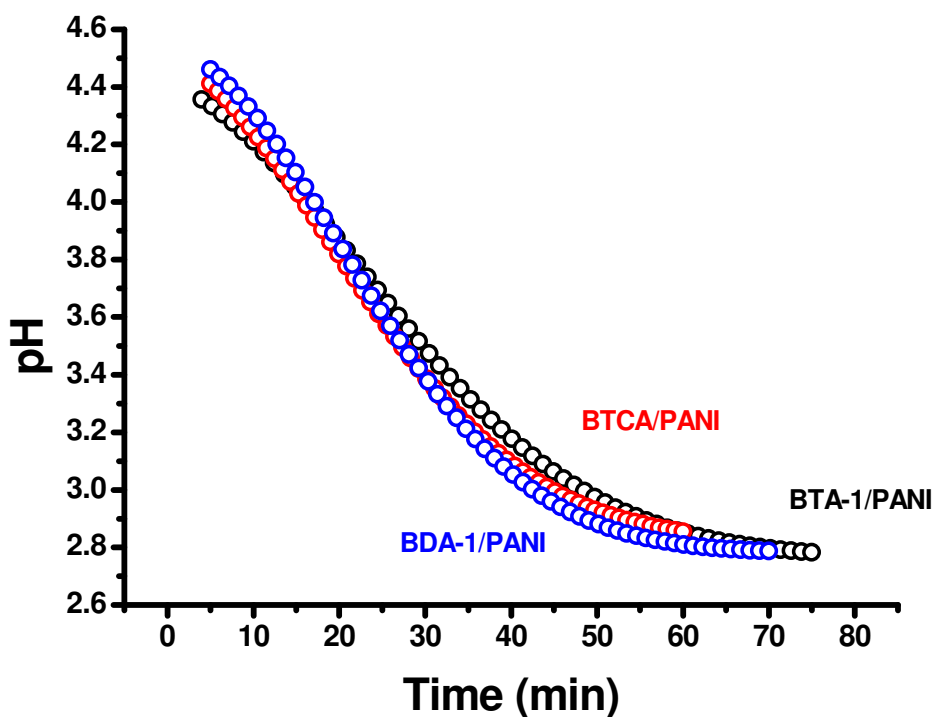

**Fig. S10:** pH –profile of all three symmetrical dopant acids under same stoichiometric condition.

**2) Table S2:** Room temperature and characteristic temperature ( $T_0$ ) conductivity of different aromatic acid doped PANI. (The electrical conductivity was calculated as the inverse of resistivity. For measurement, PANI sample was pelletized under 2.5 torr pressure to give it a disk type shape. Then four probe connections were made by copper wire using silver epoxy. The measurement was done three times taking three different pellets. These measurements were consistent to each other).

| Sample Name | $T_0(\times 10^7)$ | Conductivity at room temperature ( $\times 10^{-3}$ S/cm) |
|-------------|--------------------|-----------------------------------------------------------|
| BDA-1(0.25) | 2.88               | 10.7                                                      |
| BTA1 (0.25) | 3.49               | 10.4                                                      |
| BTA1 (0.1)  | 6.53               | 0.503                                                     |
| BTA1 (0.01) | 4.54               | 2.01                                                      |
| BTA2 (0.25) | 2.61               | 4.2                                                       |
| BTA3 (0.25) | 3.26               | 3.99                                                      |
| BPCA (0.25) | 12.28              | 588                                                       |
| TPCA (0.25) | 1.95               | 3.15                                                      |

#### 4. References:

S1. P. K. Sukul and Sudip Malik, *RSC Adv.*, 2013, **3**, 1902.

S2. R. L. Lundblad and F. M. MacDonald, *Handbook of Biochemistry and Molecular Biology*, 4<sup>th</sup> Ed., 2010, 595.

S3. J. Stejskal, I. Sapurina, M. Trchová and E. N. Konyushenko, *Macromolecules*, 2008, **41**, 3530.
